# Supplementary material for: Longitudinal qPCR Study of the Dynamics of L. crispatus, L. iners, A. vaginae, (Sialidase Positive) G. vaginalis, and P. bivia in the Vagina
Source: PubMed Central journal article supplement (PMC3448655; doi:10.1371/journal.pone.0045281), 2012-09-21
Supplement: pone.0045281.s001.pdf [file pone.0045281.s001.pdf]

Supporting Information file 1.

**Bacterial concentrations of *Lactobacillus crispatus*, *L. iners*, *Atopobium vaginae*, *Prevotella bivia* and sialidase positive *Gardnerella vaginalis* during the menstruation cycle**

**Normal VMF Group (N)**

**Normal VMF**

**N = 9**

# Legend

|                                              |                                       |                    |                      |                           |
|----------------------------------------------|---------------------------------------|--------------------|----------------------|---------------------------|
| <b>VMF grade</b>                             | 1-L: grade I-like                     |                    |                      |                           |
| <b>H<sub>2</sub>O<sub>2</sub> production</b> | 0 : No production                     | 1: weak production | 2: strong production | 3: very strong production |
| <b>GPC (Gram positive cocci)</b>             | G: Gram positive cocci present        |                    |                      |                           |
| <b>Yeast</b>                                 | Y: Yeast present                      |                    |                      |                           |
| <b>Menses</b>                                | M: Menses                             |                    |                      |                           |
| <b>Sexual intercourse</b>                    | C: Condom                             | NC: No condom      |                      |                           |
| <b>Antibiotics</b>                           | AB: Antibiotics use                   |                    |                      |                           |
| <b>Hygiene</b>                               | S: shower                             | B: bath            | IH: Intimate hygiene | O: No hygiene reported    |
| <b>NA</b>                                    | Not assessed                          |                    |                      |                           |
| <b>NT</b>                                    | Not tested due to loss of DNA-extract |                    |                      |                           |



















# **Disturbed VMF Group (D)**

**Disturbed VMF**

**N = 8**
