# Supplementary material for: Longitudinal qPCR Study of the Dynamics of L. crispatus, L. iners, A. vaginae, (Sialidase Positive) G. vaginalis, and P. bivia in the Vagina
Source: PubMed Central journal article supplement (PMC3448655; doi:10.1371/journal.pone.0045281), 2012-09-21
Supplement: pone.0045281.s002.pdf [file pone.0045281.s002.pdf]

Supporting Information file 2.

| Group | Subject | Culture moment | VMF Grade                       | Species                               | H <sub>2</sub> O <sub>2</sub> -score* |  |
|-------|---------|----------------|---------------------------------|---------------------------------------|---------------------------------------|--|
| N     | #02     | Day 7          | Ia                              | <i>Streptococcus agalactiae</i>       | 3                                     |  |
|       | #02     | Day 7          | Ia                              | <i>Lactobacillus crispatus</i>        | 3                                     |  |
|       | #02     | Day 14         | Ia                              | <i>Lactobacillus jensenii</i>         | 3                                     |  |
|       | #02     | Day 14         | Ia                              | <i>Lactobacillus crispatus</i>        | 3                                     |  |
|       | #02     | Day 21         | Iab                             | <i>Lactobacillus jensenii</i>         | 3                                     |  |
|       | #02     | Day 21         | Iab                             | <i>Streptococcus agalactiae</i>       | 3                                     |  |
|       | #02     | Day 21         | Iab                             | <i>Lactobacillus crispatus</i>        | 3                                     |  |
|       | #02     | Day 28         | Iab                             | <i>Lactobacillus jensenii</i>         | 3                                     |  |
|       | #02     | Day 28         | Iab                             | <i>Lactobacillus crispatus</i>        | 3                                     |  |
|       | #02     | Day 28         | Iab                             | <i>Staphylococcus epidermidis</i>     | 3                                     |  |
|       | #02     | Day 35         | II                              | <i>Peptostreptococcus anaerobius</i>  | 1                                     |  |
|       | #02     | Day 35         | II                              | <i>Peptoniphilus asaccharolyticus</i> | 1                                     |  |
|       | #02     | Day 35         | II                              | <i>Streptococcus anginosus</i> group  | 1                                     |  |
|       | #02     | Day 35         | II                              | <i>Alloscardovia omnicolens</i>       | 1                                     |  |
|       | #02     | Day 42         | Iab                             | <i>Streptococcus agalactiae</i>       | 3                                     |  |
|       | #02     | Day 42         | Iab                             | <i>Lactobacillus crispatus</i>        | 3                                     |  |
|       | #02     | Day 42         | Iab                             | <i>Lactobacillus jensenii</i>         | 3                                     |  |
|       | #02     | Day 49         | II                              | <i>Lactobacillus jensenii</i>         | 3                                     |  |
|       | #02     | Day 49         | II                              | <i>Lactobacillus crispatus</i>        | 3                                     |  |
|       | #02     | Day 56         | Iab                             | <i>Lactobacillus jensenii</i>         | 3                                     |  |
|       | #02     | Day 56         | Iab                             | <i>Alloscardovia omnicolens</i>       | 3                                     |  |
|       |         |                |                                 |                                       |                                       |  |
|       | #04     | Day 7          | Ib                              | <i>Lactobacillus gasseri</i>          | 1                                     |  |
|       | #04     | Day 7          | Ib                              | <i>Alloscardovia omnicolens</i>       | 1                                     |  |
|       | #04     | Day 14         | Ib                              | <i>Alloscardovia omnicolens</i>       | 1                                     |  |
|       | #04     | Day 14         | Ib                              | <i>Lactobacillus gasseri</i>          | 1                                     |  |
|       | #04     | Day 21         | Ia                              | <i>Lactobacillus gasseri</i>          | 1                                     |  |
|       | #04     | Day 35         | Ib                              | <i>Lactobacillus gasseri</i>          | 1                                     |  |
|       | #04     | Day 42         | Ib                              | <i>Lactobacillus gasseri</i>          | 1                                     |  |
|       | #04     | Day 49         | II                              | <i>Actinomyces urogenitalis</i>       | 0                                     |  |
|       | #04     | Day 56         | Ib                              | <i>Lactobacillus gasseri</i>          | 1                                     |  |
|       |         |                |                                 |                                       |                                       |  |
|       | #05     | Day 7          | Ib                              | <i>Staphylococcus aureus</i>          | 2                                     |  |
|       | #05     | Day 7          | Ib                              | <i>Lactobacillus crispatus</i>        | 2                                     |  |
| #05   | Day 14  | Ia             | <i>Lactobacillus crispatus</i>  | 3                                     |                                       |  |
| #05   | Day 21  | I-like         | <i>Streptococcus agalactiae</i> | 3                                     |                                       |  |
| #05   | Day 21  | I-like         | <i>Lactobacillus crispatus</i>  | 3                                     |                                       |  |
| #05   | Day 28  | Ia             | <i>Lactobacillus crispatus</i>  | 3                                     |                                       |  |
| #05   | Day 28  | Ia             | <i>Streptococcus anginosus</i>  | 3                                     |                                       |  |
| #05   | Day 35  | IV             | <i>Lactobacillus crispatus</i>  | 2                                     |                                       |  |

| Group | Subject | Culture moment | VMF Grade | Species                               | H <sub>2</sub> O <sub>2</sub> -score* |
|-------|---------|----------------|-----------|---------------------------------------|---------------------------------------|
|       | #05     | Day 35         | IV        | <i>Streptococcus agalactiae</i>       | 2                                     |
|       | #05     | Day 35         | IV        | <i>Peptoniphilus asaccharolyticus</i> | 2                                     |
|       | #05     | Day 42         | Ia        | <i>Staphylococcus haemolyticus</i>    | 3                                     |
|       | #05     | Day 42         | Ia        | <i>Lactobacillus vaginalis</i>        | 3                                     |
|       | #05     | Day 42         | Ia        | <i>Lactobacillus crispatus</i>        | 3                                     |
|       | #05     | Day 49         | Ia        | <i>Bifidobacterium breve</i>          | 3                                     |
|       | #05     | Day 49         | Ia        | <i>Staphylococcus epidermidis</i>     | 3                                     |
|       | #05     | Day 49         | Ia        | <i>Lactobacillus vaginalis</i>        | 3                                     |
|       | #05     | Day 56         | Iab       | <i>Alloscardovia omnicolens</i>       | 3                                     |
|       | #05     | Day 56         | Iab       | <i>Peptoniphilus asaccharolyticus</i> | 3                                     |
|       | #05     | Day 56         | Iab       | <i>Lactobacillus crispatus</i>        | 3                                     |
|       | #05     | Day 59         | Ia        | <i>Lactobacillus crispatus</i>        | 3                                     |
|       | #05     | Day 59         | Ia        | <i>Streptococcus anginosus</i> group  | 3                                     |
|       |         |                |           |                                       |                                       |
|       | #06     | Day 7          | Ia        | <i>Lactobacillus crispatus</i>        | 3                                     |
|       | #06     | Day 7          | Ia        | <i>Lactobacillus jensenii</i>         | 3                                     |
|       | #06     | Day 14         | II        | <i>Lactobacillus crispatus</i>        | 3                                     |
|       | #06     | Day 21         | II        | <i>Lactobacillus crispatus</i>        | 3                                     |
|       | #06     | Day 21         | II        | <i>Lactobacillus jensenii</i>         | 3                                     |
|       | #06     | Day 27         | Ia        | <i>Lactobacillus jensenii</i>         | 3                                     |
|       | #06     | Day 27         | Ia        | <i>Lactobacillus crispatus</i>        | 3                                     |
|       | #06     | Day 34         | Ia        | <i>Streptococcus anginosus</i>        | 3                                     |
|       | #06     | Day 34         | Ia        | <i>Lactobacillus crispatus</i>        | 3                                     |
|       | #06     | Day 41         | II        | <i>Lactobacillus jensenii</i>         | 3                                     |
|       | #06     | Day 41         | II        | <i>Lactobacillus crispatus</i>        | 3                                     |
|       | #06     | Day 48         | Ia        | <i>Lactobacillus jensenii</i>         | 3                                     |
|       | #06     | Day 48         | Ia        | <i>Alloscardovia omnicolens</i>       | 3                                     |
|       | #06     | Day 55         | Ia        | <i>Alloscardovia omnicolens</i>       | 3                                     |
|       |         |                |           |                                       |                                       |
|       | #12     | Day 7          | Ia        | <i>Lactobacillus crispatus</i>        | 2                                     |
|       | #12     | Day 14         | Ia        | <i>Lactobacillus jensenii</i>         | 3                                     |
|       | #12     | Day 14         | Ia        | <i>Streptococcus anginosus</i> group  | 3                                     |
|       | #12     | Day 14         | Ia        | <i>Lactobacillus crispatus</i>        | 3                                     |
|       | #12     | Day 21         | Ia        | <i>Lactobacillus jensenii</i>         | 3                                     |
|       | #12     | Day 21         | Ia        | <i>Lactobacillus crispatus</i>        | 3                                     |
|       | #12     | Day 28         | Ia        | <i>Lactobacillus crispatus</i>        | 2                                     |
|       | #12     | Day 35         | Ia        | <i>Lactobacillus crispatus</i>        | 3                                     |
|       | #12     | Day 43         | II        | <i>Lactobacillus jensenii</i>         | 3                                     |
|       | #12     | Day 49         | II        | <i>Lactobacillus jensenii</i>         | 3                                     |
|       | #12     | Day 49         | II        | <i>Lactobacillus crispatus</i>        | 3                                     |
|       | #12     | Day 56         | Ia        | <i>Lactobacillus jensenii</i>         | 2                                     |
|       | #12     | Day 64         | Ia        | <i>Lactobacillus jensenii</i>         | 2                                     |

| Group | Subject | Culture moment | VMF Grade | Species                              | H <sub>2</sub> O <sub>2</sub> -score* |
|-------|---------|----------------|-----------|--------------------------------------|---------------------------------------|
|       | #12     | Day 71         | Ia        | <i>Lactobacillus jensenii</i>        | 1                                     |
|       |         |                |           |                                      |                                       |
|       | #14     | Day 6          | Ia        | <i>Lactobacillus jensenii</i>        | 3                                     |
|       | #14     | Day 13         | Ia        | <i>Lactobacillus jensenii</i>        | 3                                     |
|       | #14     | Day 13         | Ia        | <i>Lactobacillus crispatus</i>       | 3                                     |
|       | #14     | Day 20         | Ia        | <i>Lactobacillus jensenii</i>        | 3                                     |
|       | #14     | Day 27         | Ia        | <i>Lactobacillus jensenii</i>        | 2                                     |
|       | #14     | Day 27         | Ia        | <i>Streptococcus anginosus</i> group | 2                                     |
|       | #14     | Day 34         | Ia        | <i>Lactobacillus jensenii</i>        | 3                                     |
|       | #14     | Day 41         | Ia        | <i>Lactobacillus jensenii</i>        | 3                                     |
|       | #14     | Day 55         | Ia        | <i>Lactobacillus jensenii</i>        | 3                                     |
|       |         |                |           |                                      |                                       |
|       | #15     | Day 7          | Ia        | <i>Lactobacillus coleohominis</i>    | 2                                     |
|       | #15     | Day 7          | Ia        | <i>Staphylococcus epidermidis</i>    | 2                                     |
|       | #15     | Day 21         | Ia        | <i>Staphylococcus hominis</i>        | 2                                     |
|       | #15     | Day 21         | Ia        | <i>Veillonella parvula</i>           | 2                                     |
|       | #15     | Day 28         | Ia        | <i>Lactobacillus crispatus</i>       | 2                                     |
|       | #15     | Day 35         | Ia        | <i>Lactobacillus coleohominis</i>    | 2                                     |
|       | #15     | Day 42         | Ia        | <i>Lactobacillus coleohominis</i>    | 2                                     |
|       | #15     | Day 49         | Ia        | <i>Lactobacillus coleohominis</i>    | 2                                     |
|       | #15     | Day 63         | Ia        | <i>Lactobacillus coleohominis</i>    | 2                                     |
|       |         |                |           |                                      |                                       |
|       | #20     | Day 7          | Ib        | <i>Escherichia coli</i>              | 3                                     |
|       | #20     | Day 7          | Ib        | <i>Lactobacillus jensenii</i>        | 3                                     |
|       | #20     | Day 14         | Ib        | <i>Lactobacillus jensenii</i>        | 3                                     |
|       | #20     | Day 21         | Ib        | <i>Lactobacillus jensenii</i>        | 3                                     |
|       | #20     | Day 21         | Ib        | <i>Alloscardovia omnicolens</i>      | 3                                     |
|       | #20     | Day 28         | IV        | <i>Streptococcus anginosus</i> group | 0                                     |
|       | #20     | Day 35         | Ib        | <i>Lactobacillus jensenii</i>        | 2                                     |
|       | #20     | Day 42         | Ib        | <i>Escherichia coli</i>              | 2                                     |
|       | #20     | Day 42         | Ib        | <i>Lactobacillus jensenii</i>        | 2                                     |
|       | #20     | Day 49         | I-like    | <i>Lactobacillus jensenii</i>        | 3                                     |
|       | #20     | Day 56         | III       | <i>Streptococcus mitis</i>           | 1                                     |
|       | #20     | Day 56         | III       | <i>Lactobacillus jensenii</i>        | 1                                     |
|       | #20     | Day 56         | III       | <i>Streptococcus oralis</i>          | 1                                     |
|       | #20     | Day 64         | Ib        | <i>Lactobacillus jensenii</i>        | 3                                     |
|       |         |                |           |                                      |                                       |
|       | #22     | Day 6          | II        | <i>Lactobacillus jensenii</i>        | 1                                     |
|       | #22     | Day 6          | II        | <i>Lactobacillus gasseri</i>         | 1                                     |
|       | #22     | Day 13         | Iab       | <i>Lactobacillus gasseri</i>         | 2                                     |
|       | #22     | Day 13         | Iab       | <i>Lactobacillus crispatus</i>       | 2                                     |
|       | #22     | Day 20         | Ia        | <i>Lactobacillus gasseri</i>         | 3                                     |

| Group | Subject | Culture moment | VMF Grade                       | Species                              | H <sub>2</sub> O <sub>2</sub> -score* |  |
|-------|---------|----------------|---------------------------------|--------------------------------------|---------------------------------------|--|
|       | #22     | Day 27         | Ia                              | <i>Lactobacillus jensenii</i>        | 2                                     |  |
|       | #22     | Day 34         | II                              | <i>Streptococcus agalactiae</i>      | 0                                     |  |
|       | #22     | Day 41         | Iab                             | <i>Lactobacillus gasseri</i>         | 2                                     |  |
|       | #22     | Day 41         | Iab                             | <i>Lactobacillus jensenii</i>        | 2                                     |  |
|       | #22     | Day 48         | Ia                              | <i>Lactobacillus crispatus</i>       | 2                                     |  |
|       | #22     | Day 55         | II                              | <i>Lactobacillus gasseri</i>         | 2                                     |  |
|       | #22     | Day 59         | Ia                              | <i>Lactobacillus gasseri</i>         | 1                                     |  |
|       |         |                |                                 |                                      |                                       |  |
| D     | #13     | Day 6          | IV                              | <i>Alloscardovia omnicolens</i>      | 0                                     |  |
|       | #13     | Day 13         | Ib                              | <i>Alloscardovia omnicolens</i>      | 0                                     |  |
|       | #13     | Day 20         | Ib                              | <i>Lactobacillus gasseri</i>         | 1                                     |  |
|       | #13     | Day 20         | Ib                              | <i>Alloscardovia omnicolens</i>      | 1                                     |  |
|       | #13     | Day 27         | II                              | <i>Lactobacillus gasseri</i>         | 1                                     |  |
|       | #13     | Day 27         | II                              | <i>Streptococcus anginosus</i> group | 1                                     |  |
|       | #13     | Day 34         | IV                              | <i>Lactobacillus gasseri</i>         | 1                                     |  |
|       | #13     | Day 34         | IV                              | <i>Alloscardovia omnicolens</i>      | 1                                     |  |
|       | #13     | Day 34         | IV                              | <i>Streptococcus anginosus</i> group | 1                                     |  |
|       | #13     | Day 41         | Ib                              | <i>Lactobacillus gasseri</i>         | 1                                     |  |
|       |         |                |                                 |                                      |                                       |  |
|       | #16     | Day 27         | I-like                          | <i>Streptococcus mitis</i>           | 0                                     |  |
|       | #16     | Day 34         | I-like                          | <i>Streptococcus anginosus</i> group | 1                                     |  |
|       | #16     | Day 41         | I-like                          | <i>Streptococcus anginosus</i> group | 1                                     |  |
|       |         |                |                                 |                                      |                                       |  |
|       | #18     | Day 7          | II                              | <i>Lactobacillus amylovorus</i>      | 3                                     |  |
|       | #18     | Day 14         | II                              | <i>Lactobacillus crispatus</i>       | 3                                     |  |
|       | #18     | Day 21         | II                              | <i>Lactobacillus crispatus</i>       | 3                                     |  |
|       | #18     | Day 28         | II                              | <i>Lactobacillus crispatus</i>       | 3                                     |  |
|       | #18     | Day 28         | II                              | <i>Streptococcus anginosus</i> group | 3                                     |  |
|       | #18     | Day 35         | II                              | <i>Lactobacillus jensenii</i>        | 3                                     |  |
|       | #18     | Day 35         | II                              | <i>Streptococcus anginosus</i> group | 3                                     |  |
|       | #18     | Day 42         | II                              | <i>Lactobacillus acidophilus</i>     | 2                                     |  |
|       | #18     | Day 42         | II                              | <i>Lactobacillus jensenii</i>        | 2                                     |  |
|       | #18     | Day 42         | II                              | <i>Lactobacillus gasseri</i>         | 2                                     |  |
|       |         |                |                                 |                                      |                                       |  |
|       | #19     | Day 13         | IV                              | <i>Alloscardovia omnicolens</i>      | 1                                     |  |
|       | #19     | Day 13         | IV                              | <i>Streptococcus anginosus</i> group | 1                                     |  |
|       | #19     | Day 20         | IV                              | <i>Alloscardovia omnicolens</i>      | 1                                     |  |
|       | #19     | Day 20         | IV                              | <i>Streptococcus anginosus</i> group | 1                                     |  |
|       | #19     | Day 29         | IV                              | <i>Alloscardovia omnicolens</i>      | 0                                     |  |
|       | #19     | Day 36         | IV                              | <i>Enterococcus faecalis</i>         | 0                                     |  |
|       | #19     | Day 43         | IV                              | <i>Streptococcus anginosus</i>       | 0                                     |  |
| #19   | Day 48  | III            | <i>Alloscardovia omnicolens</i> | 0                                    |                                       |  |

| Group | Subject | Culture moment | VMF Grade | Species                              | H <sub>2</sub> O <sub>2</sub> -score* |
|-------|---------|----------------|-----------|--------------------------------------|---------------------------------------|
|       | #19     | Day 57         | IV        | <i>Enterococcus faecalis</i>         | 1                                     |
|       |         |                |           |                                      |                                       |
|       | #21     | Day 7          | III       | <i>Lactobacillus crispatus</i>       | 3                                     |
|       | #21     | Day 14         | 0         | <i>Escherichia coli</i>              | 0                                     |
|       | #21     | Day 21         | II        | <i>Streptococcus anginosus</i> group | 0                                     |
|       | #21     | Day 28         | Ib        | <i>Staphylococcus haemolyticus</i>   | 0                                     |
|       | #21     | Day 42         | Ib        | <i>Lactobacillus crispatus</i>       | 2                                     |
|       | #21     | Day 42         | Ib        | <i>Streptococcus anginosus</i> group | 2                                     |
|       | #21     | Day 49         | Ib        | <i>Lactobacillus crispatus</i>       | 2                                     |
|       | #21     | Day 49         | Ib        | <i>Streptococcus anginosus</i> group | 2                                     |
|       | #21     | Day 56         | II        | <i>Staphylococcus epidermidis</i>    | 1                                     |
|       |         |                |           |                                      |                                       |
|       | #24     | Day 7          | III       | <i>Streptococcus anginosus</i> group | 0                                     |
|       | #24     | Day 27         | III       | <i>Streptococcus anginosus</i> group | 0                                     |
|       | #24     | Day 34         | III       | <i>Streptococcus anginosus</i> group | 0                                     |
|       |         |                |           |                                      |                                       |
|       | #25     | Day 7          | Ib        | <i>Lactobacillus vaginalis</i>       | 1                                     |
|       | #25     | Day 7          | Ib        | <i>Staphylococcus aureus</i>         | 1                                     |
|       | #25     | Day 14         | II        | <i>Lactobacillus jensenii</i>        | 3                                     |
|       | #25     | Day 14         | II        | <i>Lactobacillus vaginalis</i>       | 3                                     |
|       | #25     | Day 21         | II        | <i>Lactobacillus jensenii</i>        | 2                                     |
|       | #25     | Day 28         | II        | <i>Lactobacillus jensenii</i>        | 2                                     |
|       | #25     | Day 28         | II        | <i>Lactobacillus jensenii</i>        | 2                                     |
|       | #25     | Day 35         | III       | <i>Lactobacillus jensenii</i>        | 1                                     |
|       | #25     | Day 35         | III       | <i>Streptococcus anginosus</i> group | 1                                     |
|       | #25     | Day 42         | II        | <i>Lactobacillus jensenii</i>        | 2                                     |
|       | #25     | Day 42         | II        | <i>Lactobacillus vaginalis</i>       | 2                                     |
|       | #25     | Day 49         | III       | <i>Streptococcus anginosus</i> group | 1                                     |
|       | #25     | Day 49         | III       | <i>Lactobacillus jensenii</i>        | 1                                     |
|       | #25     | Day 56         | II/III    | <i>Lactobacillus jensenii</i>        | 1                                     |
|       | #25     | Day 56         | II/III    | <i>Lactobacillus vaginalis</i>       | 1                                     |

Legend: The days in red represent the culture moments during the menses

\*: The H<sub>2</sub>O<sub>2</sub>-score represents the score of the entire culture plate: score 0 (no H<sub>2</sub>O<sub>2</sub> production), score 1 (weak H<sub>2</sub>O<sub>2</sub>-production), score 2 (strong H<sub>2</sub>O<sub>2</sub>-production) and score 3 (very blue, very strong H<sub>2</sub>O<sub>2</sub>-production)
